# Supplementary material for: Graphene oxide nanosheets promoted regioselective and green synthesis of new dicoumarols
Source: Royal Society of Chemistry journal article supplement (doi:10.1039/c4ra00508b), 2014-01-01

## Supporting Information

# Graphene oxide nanosheets promoted regioselective and green synthesis of new dicoumarols

*Saeed Khodabakhshi,\*<sup>a</sup> Bahador Karami,\*<sup>a</sup> Khalil Eskandari,<sup>a</sup> S. Jafar Hoseini<sup>a</sup> and Alimorad Rashidi<sup>b</sup>*

*Department of Chemistry, Yasouj University, P. O. Box 353, Yasouj, 75918-74831, Iran. E-mail: karami@mail.yu.ac.ir; Fax: +98 7412242167; Tel: +98 7412223048*

Figure SI-S1

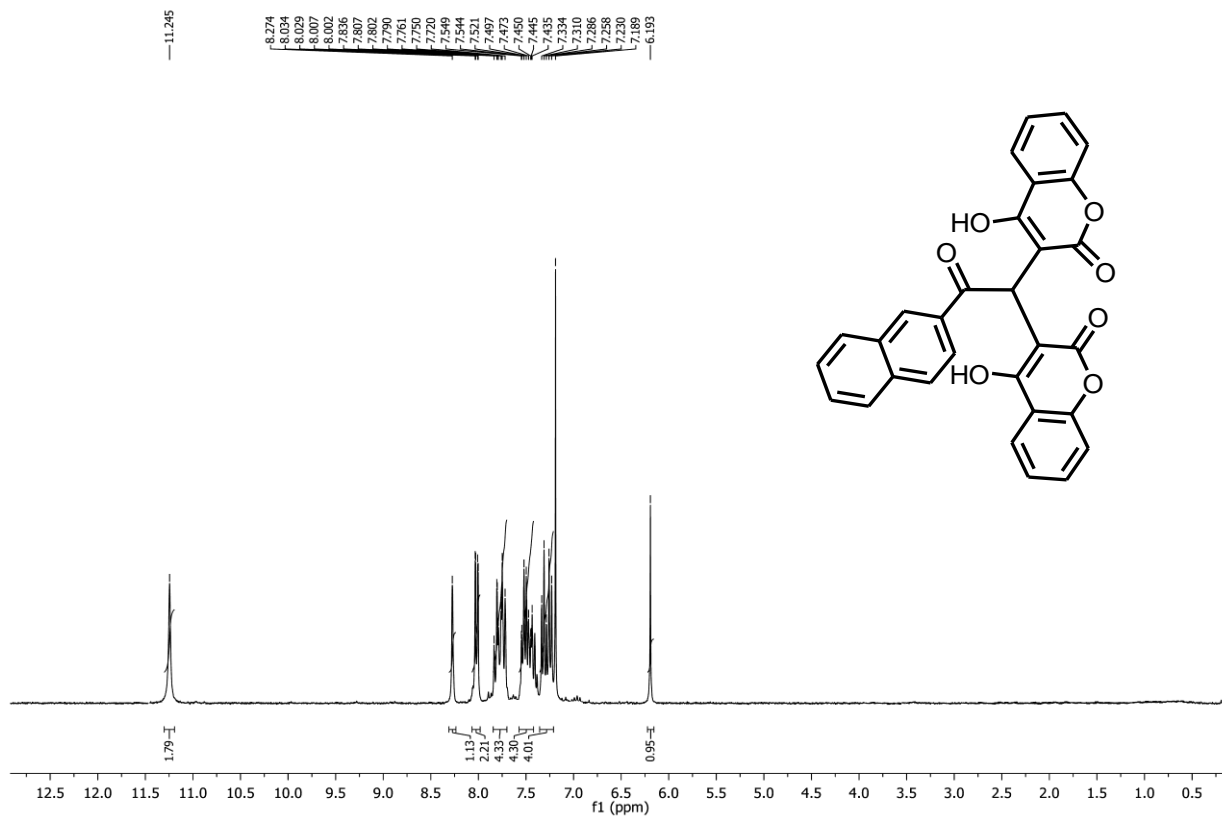

Figure SI-S2

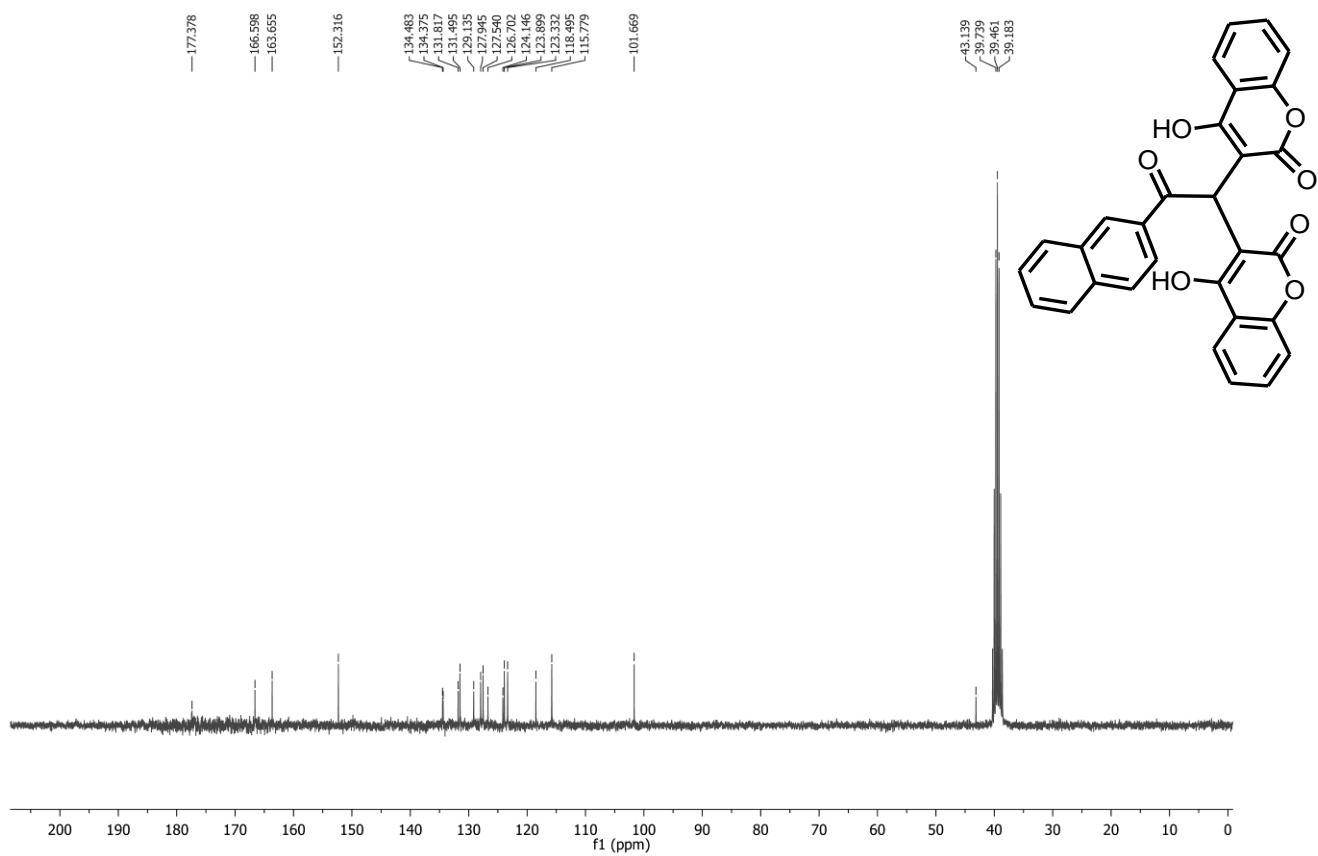

Figure S1-S3

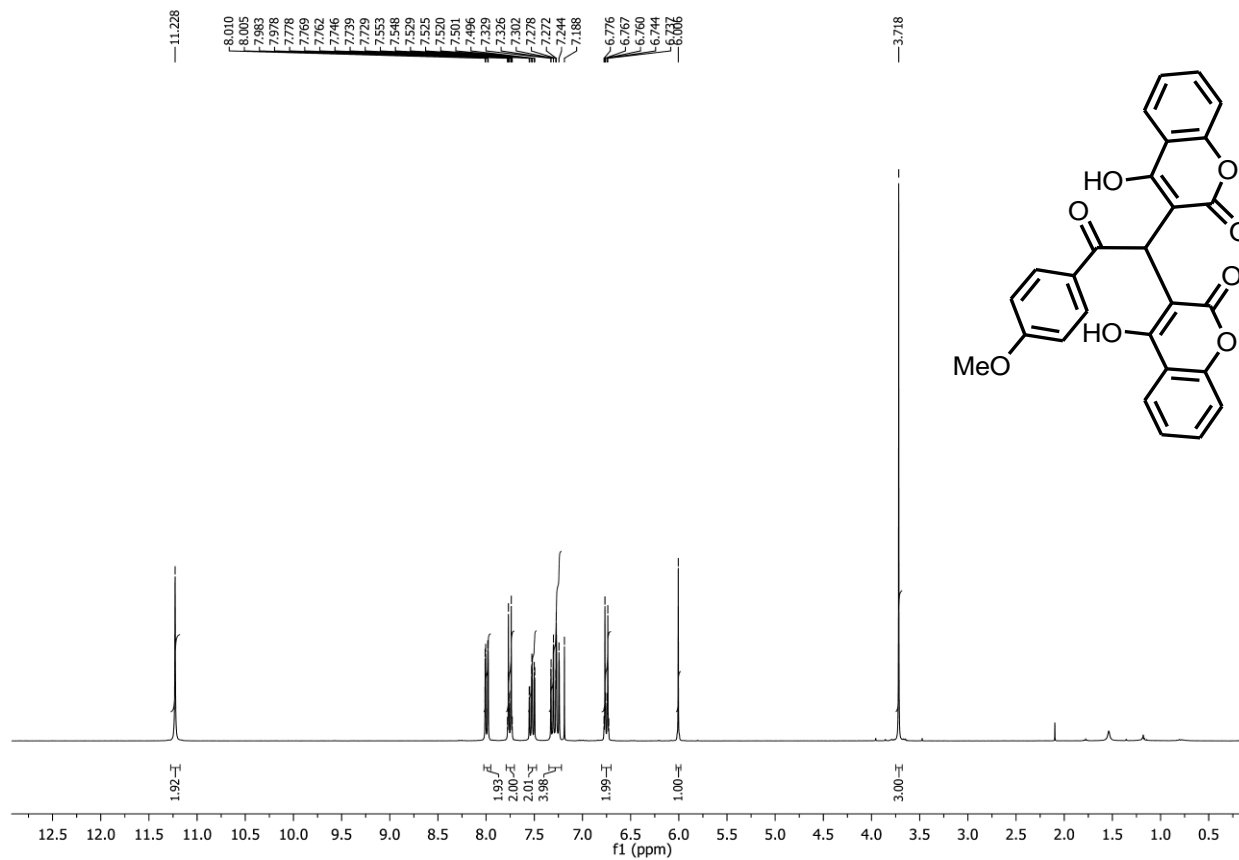

Figure S1-S4

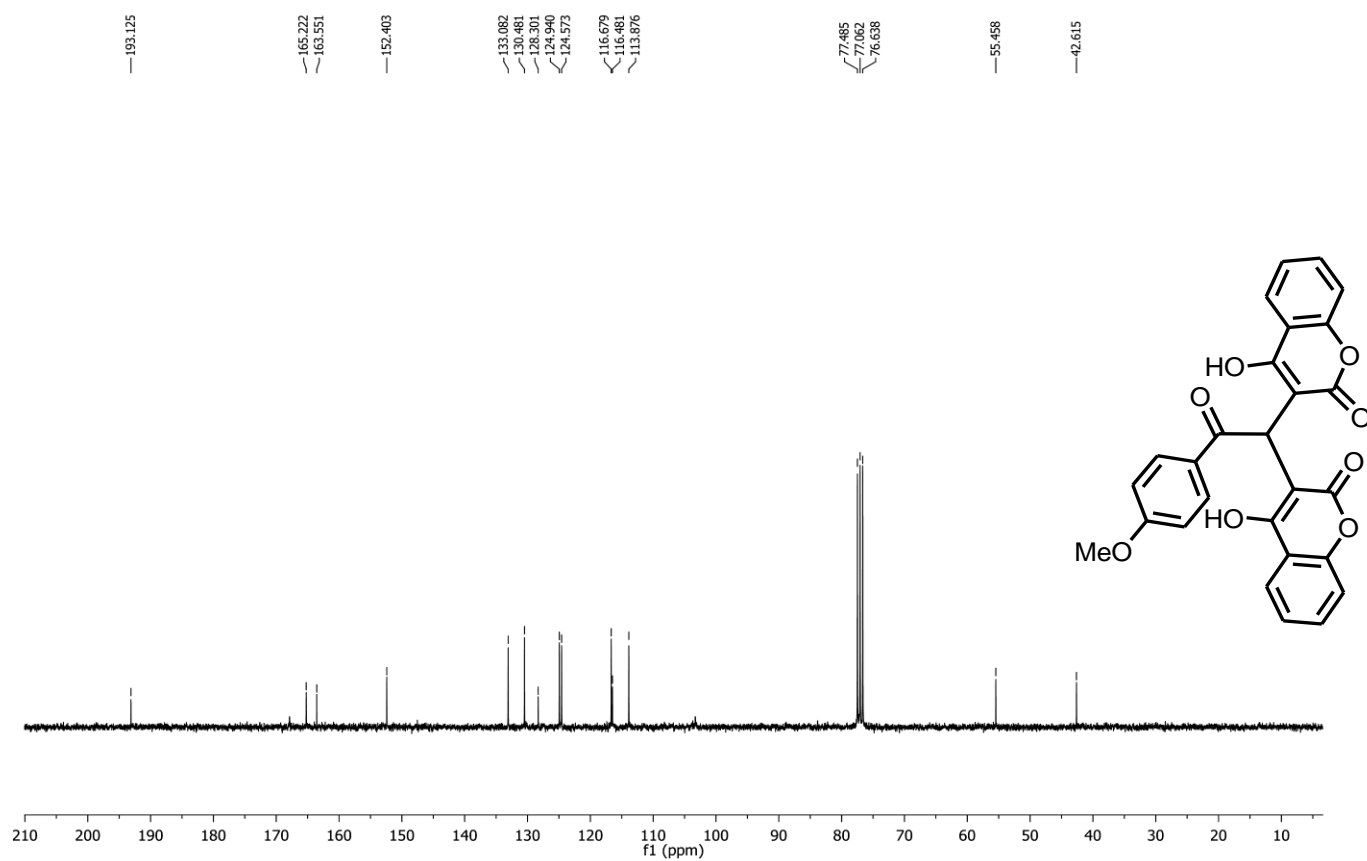

Figure S1–S5

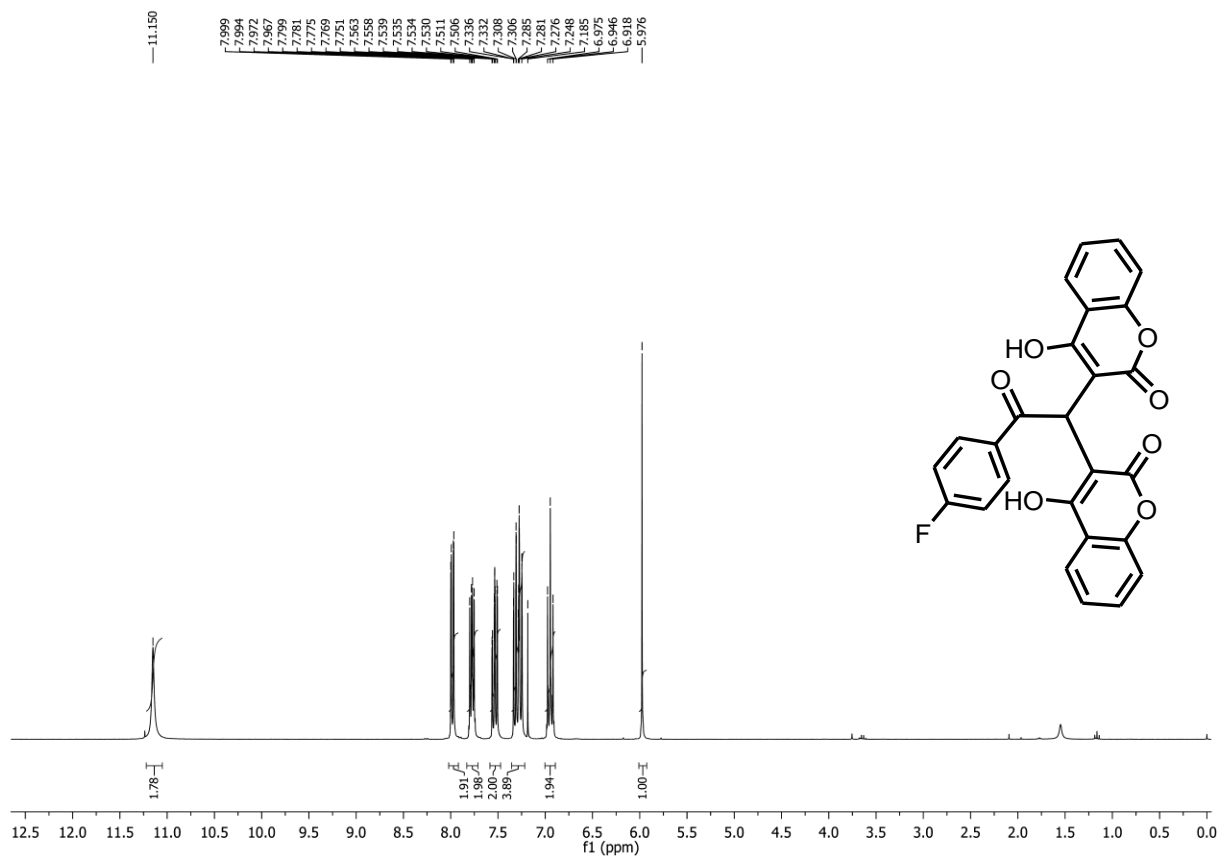

Figure S1–S6

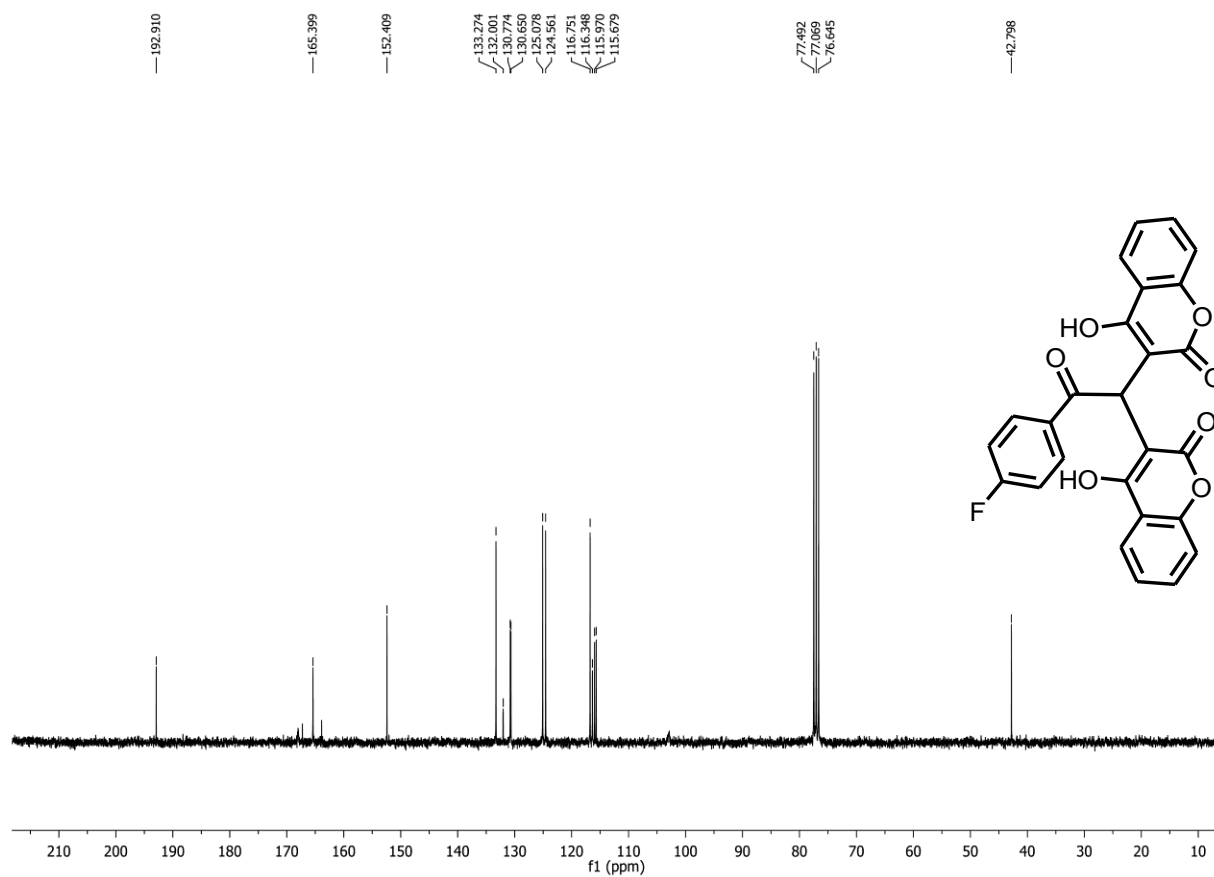

Figure S1–S7

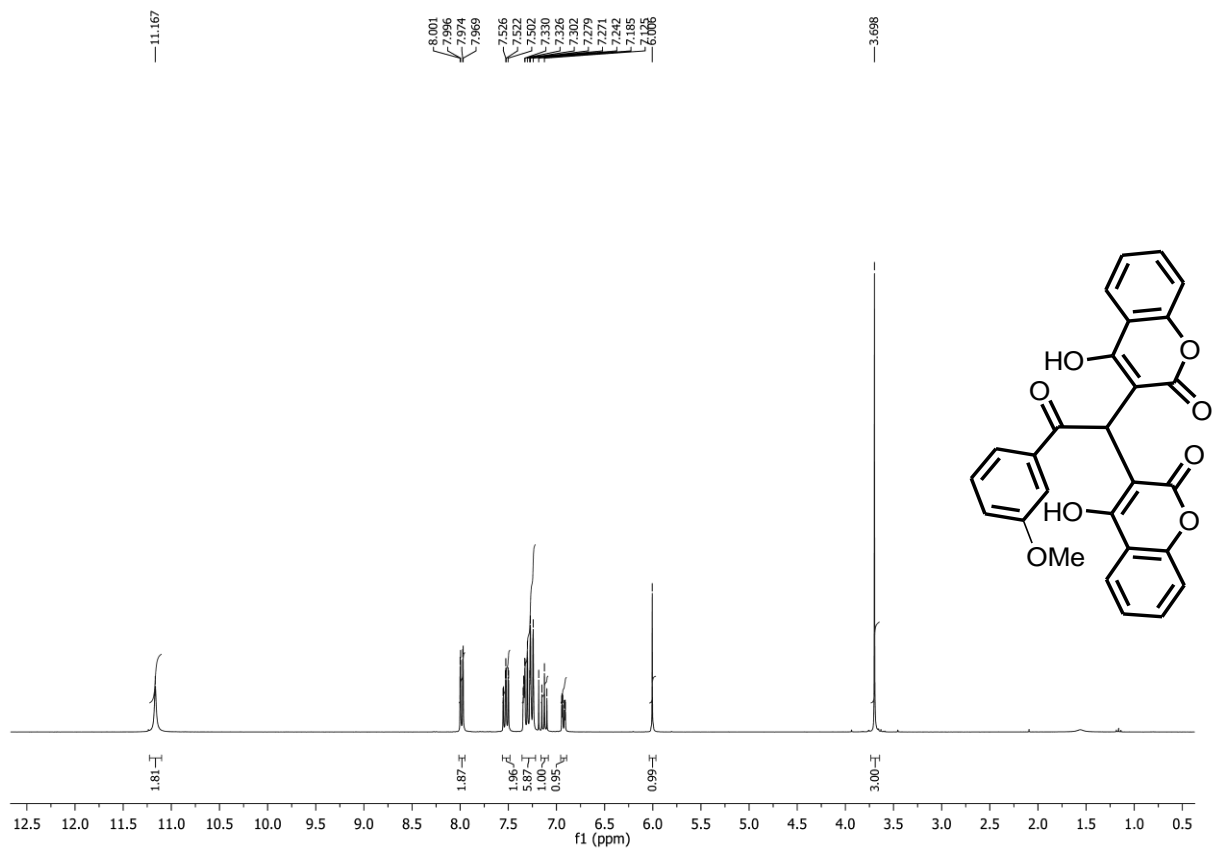



Figure S1–S8

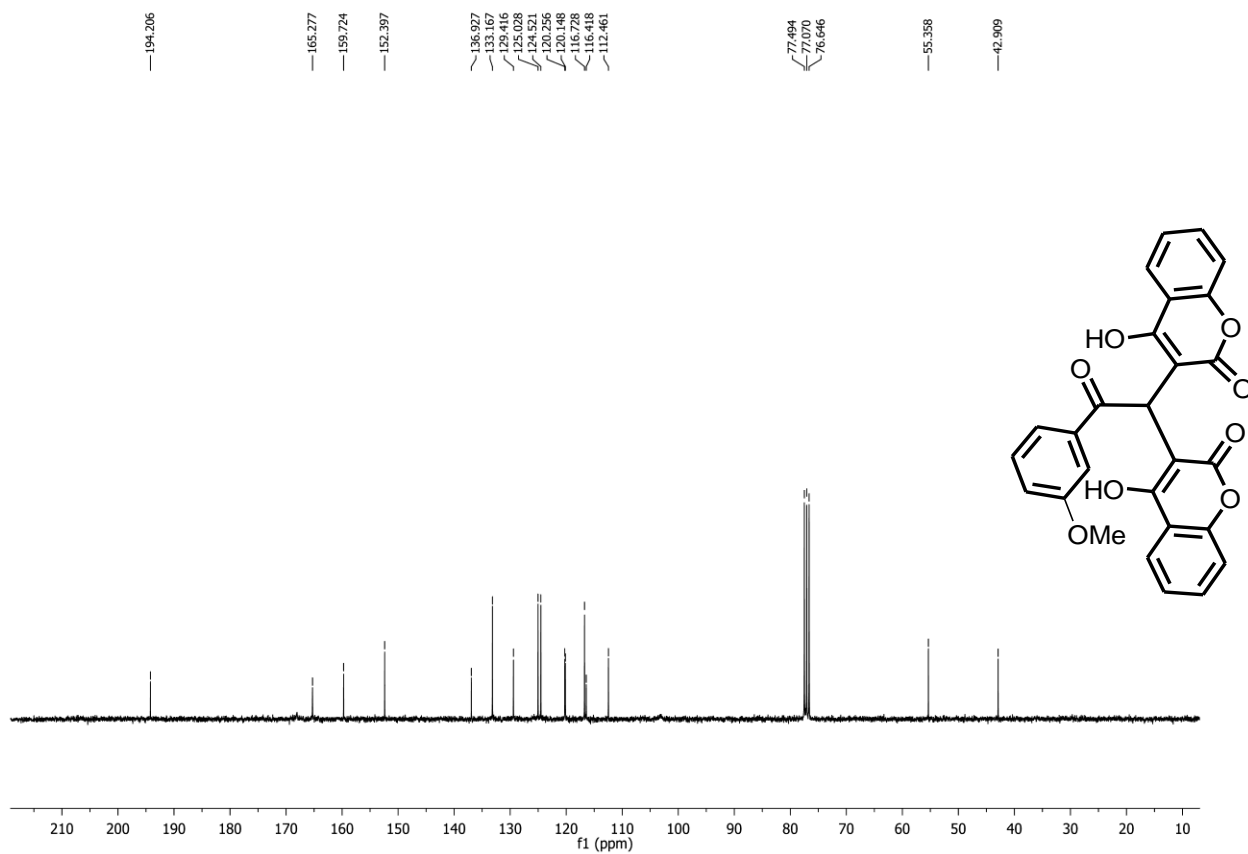

Figure S1-S9

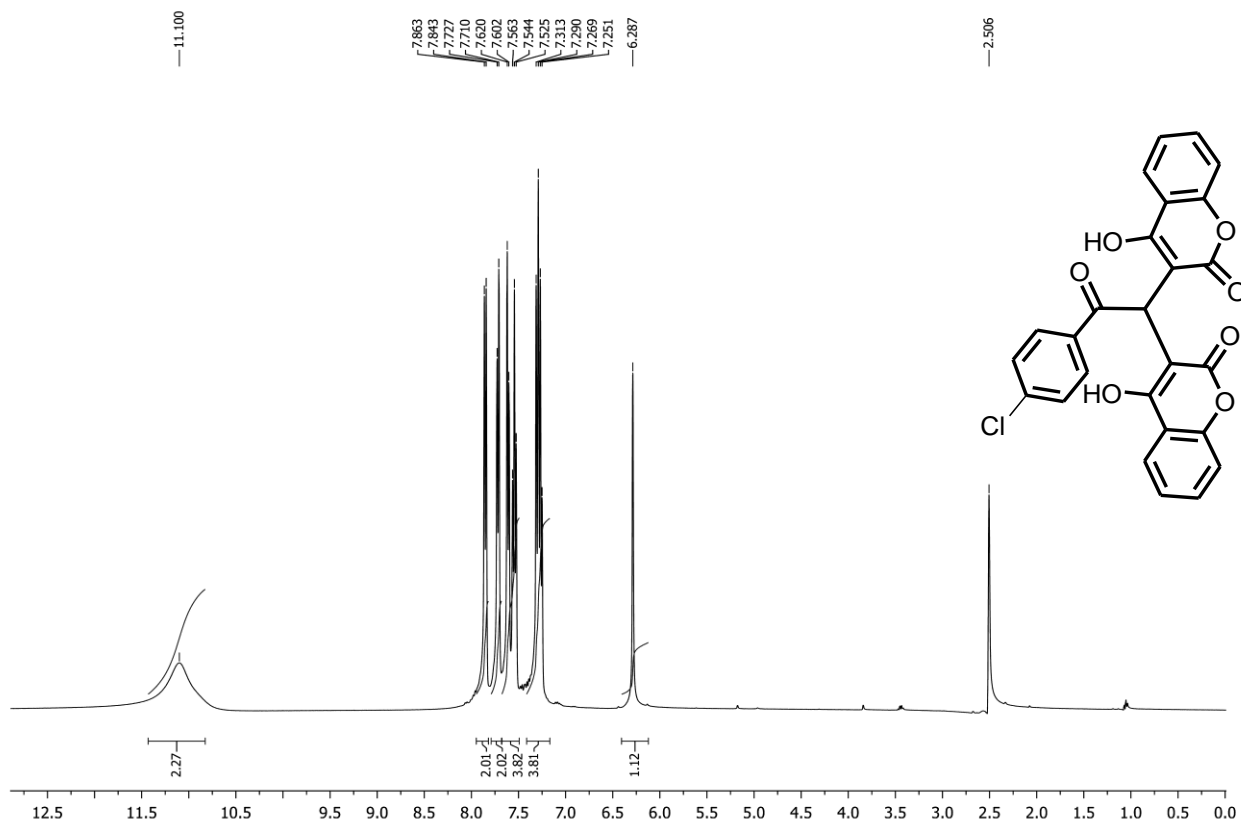

Figure S1–S10

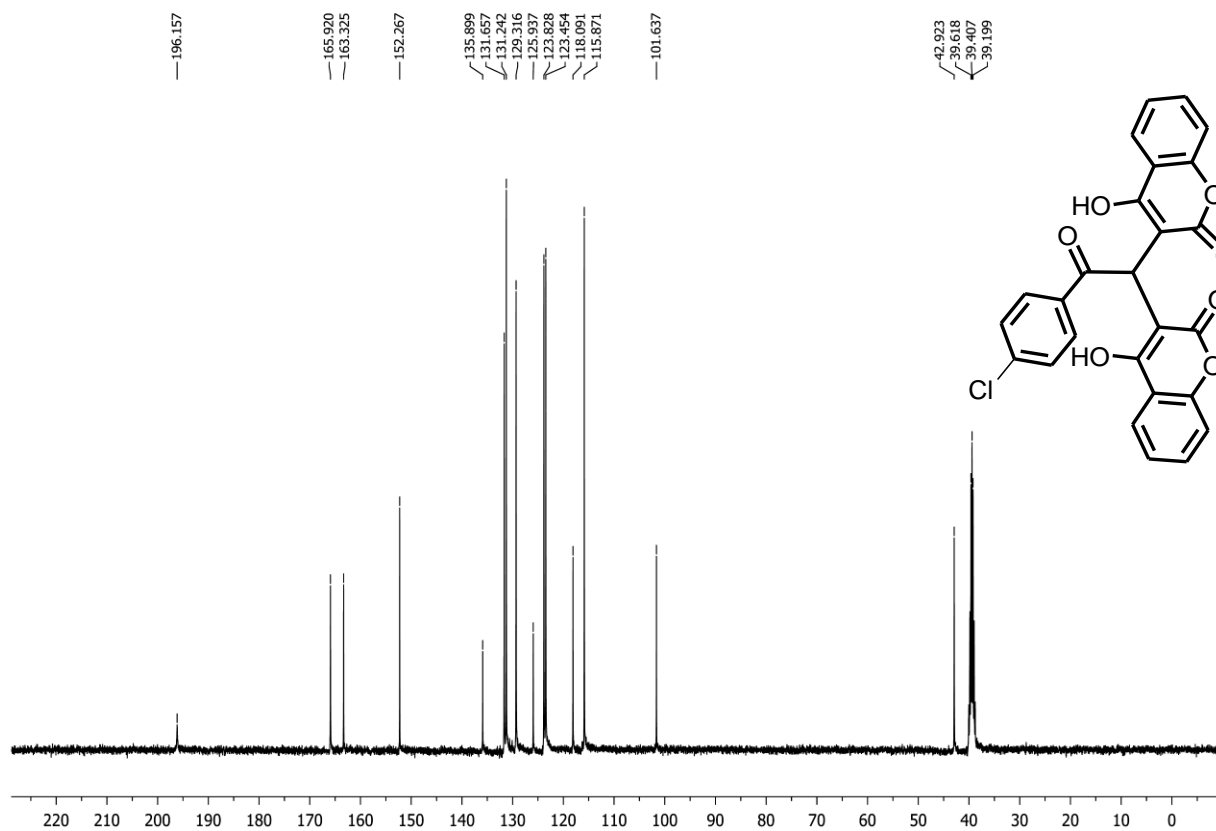

Supplement: c4ra00508b1.pdf [file c4ra00508b1.pdf]
